# Supplementary material for: Eddy enhanced primary production accelerates bacterial growth in the Eastern Tropical North Atlantic
Source: Copernicus journal article supplement (doi:10.5194/bg-2022-49), 2022-02-21
Supplement: Supplementary file 1 [file bg-2022-49-supplement.pdf]

# 1 Supplementary information

2

## 3 Stations localization

4

5 Eddies are commonly located and constrained using satellite altimetry data (e.g. CMEMS,  
6 <https://marine.copernicus.eu>). Yet, satellite data are an orientation but often not satisfying to  
7 locate eddies for dedicated biogeochemical sampling (Fischer et al. 2021; Fischer et al. in  
8 preparation). To estimate the physical properties of the cyclonic eddy in our study, we used  
9 multi-section velocity data from a vessel-mounted Acoustic Doppler Current Profiler  
10 (vmADCP) data. Following previous studies (Casteleo and Johns 2011; Castelao et al. 2013;  
11 Bendinger et al. in preparation), we apply a nonlinear least-squares optimization to reconstruct  
12 the eddy within a cylindrical coordinate framework (Fig. S1). Briefly, assuming a radially  
13 axisymmetric, non-translating vortex the methodology optimizes the azimuthal velocity while  
14 coming up with an eddy center estimate. The estimated eddy center is then used to derive the  
15 radial azimuthal velocity structure before determining its radius and maximum azimuthal  
16 velocity. This characterization is based on the assumption of solid-body rotation, meaning that  
17 the azimuthal velocity linearly increases from the center toward the core-periphery (maximum  
18 swirl velocity, R1). Outside, toward the eddy periphery (R0), the velocity structure may be  
19 defined by a hyperbolic or exponential decay.

20 The radial structure of azimuthal velocity  $v_\theta$  is given by

$$21 \quad v_\theta = -u \sin(\theta) + v \cos(\theta),$$

22 where  $u$  and  $v$  are the zonal and meridional velocities as measured by the vmADCP, and  
23  $\theta = \arctan((y - y_c)/(x - x_c))$  with  $(x, y)$  the position vectors of the velocity samples and  
24  $(x_c, y_c)$  the eddy center coordinates. In the framework of solid-body rotation, the relative  
25 vorticity  $\zeta_z$  is given by

$$26 \quad \zeta_z = \frac{1}{r} \frac{\partial(rv_\theta)}{\partial r}$$

27 where  $r$  is the radius. The eddy periphery R0 is defined where  $\zeta_z = 0$ , i.e.  $\frac{\partial v_\theta}{\partial r} = -\frac{v_\theta}{r}$ .

28 We determined the eddy center at [18.69 °N, 18.05 °W] with a core radius of  $40.5 \pm 5.7$  km  
29 (Fig. S1) on the 22/07/19. However, the estimations of the eddy periphery from the three  
30 vmADCP sections showed high variability with a radius of the eddy periphery (R0) ranging

31 between 70 and 90km. Therefore we decided to define the stations inside the periphery of the  
 32 eddy from the eddy-induced variability on surface temperature, salinity and chlorophyll a (Fig.  
 33 **1b,c,d**).

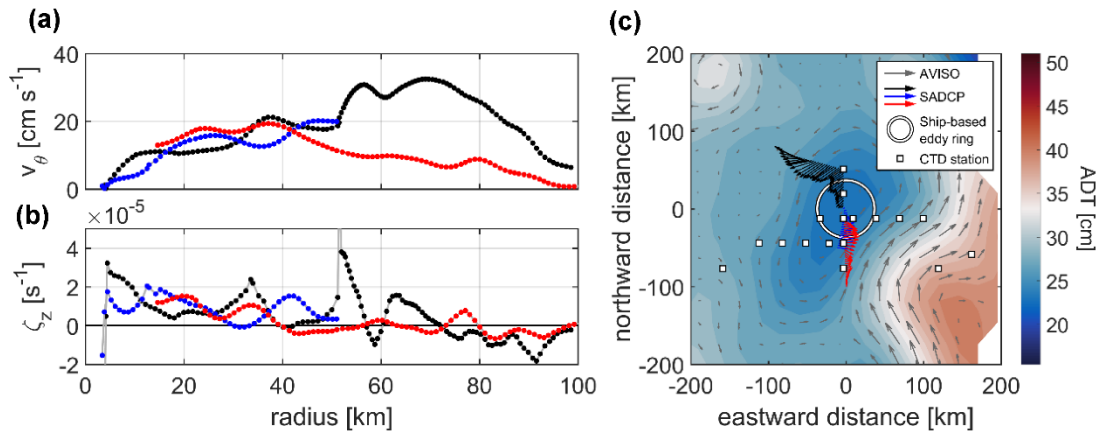

34  
 35 Figure S1: Mean 17.5-49.5 m radial profiles of (a) azimuthal velocity and (b) relative vorticity as a  
 36 function of radius from the eddy centre as measured and derived by the 75 kHz vmADCP, (c)  
 37 Background geostrophic velocity field (gray vectors) including absolute dynamics topography (ADT,  
 38 shading) from 23 July 2019 downloaded from CMEMS. The eddy boundary (defined as the maximum  
 39 azimuthal velocity) is given by the white circle where the coordinate origin represents the eddy center.  
 40 Mean 17.5-49.5 velocity vectors for three ship transects across the eddy taking place from 21 July 2019  
 41 15:46:00 to 22 July 14:16:00 (black, blue) and from 25 July 2019 15:25 to 25 July 2019 19:47 (red),  
 42 respectively. Undertaken CTD stations are marked by the white squares.

43  
 44 Taking into account the movement of the CE with an average speed of  $3 \text{ km d}^{-1}$  (Schütte et al.  
 45 2016), and the sampling date, the stations within the core-periphery were characterized as  
 46 “core” and those outside the core and within the eddy-influenced area as “periphery” (SI table  
 47 **1**). An anticyclonic eddy was forming along the Mauritanian Coast (core,  $17.7^\circ\text{N}$ ,  $17^\circ\text{W}$ ) and  
 48 was interfering with the velocity field of the CE (Fischer et al. 2021; Fischer et al. in  
 49 preparation). As the anticyclonic eddy was not fully detached from the coast we considered the  
 50 stations within it to be still representative of the coast and we characterize them as “coastal” (SI  
 51 Table **1**). Although not reliable for the exact localization of the cores and diameter of eddies,  
 52 surface height anomaly showed that St. E3 was in the middle of two cyclonic eddies. Therefore  
 53 St. E3 was likely to be influenced by the phenomenon of frontogenesis and was characterized  
 54 as a “Frontal Zone”. Stations located offshore not likely to be influenced by eddies were defined  
 55 as “open ocean”.

58 Table n°1: Characteristic of M156 sampling stations

| Station | Date       | Time<br>(UTC) | Longitude<br>(°W) | Latitude<br>(°N) | Position     | Mixed layer<br>depth (m) | Distance from the<br>eddy center (km) |
|---------|------------|---------------|-------------------|------------------|--------------|--------------------------|---------------------------------------|
| E1      | 07/04/2019 | 07:58         | -24,33            | 18,00            | Open ocean   | 31                       | >200                                  |
| S1      | 07/05/2019 | 05:00         | -23,61            | 18,00            | Open ocean   | 32                       | >200                                  |
| S2      | 07/08/2019 | 04:58         | -22,78            | 18,00            | Open ocean   | 29                       | >200                                  |
| E2      | 07/07/2019 | 03:48         | -22,00            | 18,00            | Open ocean   | 31                       | >200                                  |
| S3      | 07/09/2019 | 05:51         | -21,13            | 18,00            | Open ocean   | 29                       | >200                                  |
| S4      | 15/07/2019 | 04:00         | -20,30            | 18,00            | Open ocean   | 25                       | >200                                  |
| E3      | 14/07/2019 | 04:00         | -19,55            | 18,00            | Frontal Zone | 24                       | 176                                   |
| EDZ-1   | 17/07/2019 | 20:50         | -19,11            | 18,29            | Periphery    | 7                        | 118                                   |
| EDZ-2   | 17/07/2019 | 23:55         | -18,83            | 18,29            | Periphery    | 11                       | 92                                    |
| EDZ-3   | 19/07/2019 | 02:10         | -18,54            | 18,29            | Periphery    | 20                       | 67                                    |
| EDM-4   | 19/07/2019 | 07:30         | -18,37            | 18,58            | Core         | 23                       | 34                                    |
| EDZ-4   | 18/07/2019 | 19:50         | -18,26            | 18,29            | Periphery    | 21                       | 50                                    |
| EDM-2E  | 21/07/2019 | 19:00         | -18,08            | 19,15            | Periphery    | 23                       | 48                                    |
| EDM-5E  | 24/07/2019 | 06:35         | -18,08            | 18,29            | Periphery    | 22                       | 47                                    |
| EDM 3E  | 22/07/2019 | 00:42         | -18,08            | 18,87            | Core         | 26                       | 16                                    |
| S5      | 23/07/2019 | 22:18         | -18,08            | 18,00            | Periphery    | 12                       | 79                                    |
| EDM 4E  | 22/07/2019 | 09:15         | -18,08            | 18,58            | Core         | 22                       | 15                                    |
| EDZ-5N  | 26/07/2019 | 02:15         | -17,97            | 18,58            | Core         | 19                       | 19                                    |
| EDZ-6N  | 26/07/2019 | 08:55         | -17,68            | 18,58            | Periphery    | 15                       | 44                                    |
| EDZ-7N  | 26/07/2019 | 22:00         | -17,39            | 18,58            | Periphery    | 6                        | 73                                    |
| EDZ-8N  | 28/07/2019 | 06:26         | -17,11            | 18,58            | Periphery    | 14                       | 103                                   |
| S6      | 29/07/2019 | 01:17         | -16,92            | 18,00            | Coastal      | 20                       | 145                                   |
| EDZ-10N | 27/07/2019 | 18:07         | -16,53            | 18,58            | Coastal      | 12                       | 162                                   |
| E5      | 27/07/2019 | 06:00         | -16,52            | 18,17            | Coastal      | 20                       | 175                                   |

62 Table n°2: Abundance of eukaryotic picoplankton (Euk Pico G1), eukaryotic nanoplankton (Euk nano  
63 G2, Euk nano G3 and chrytophyta G5) and cyanobacteria *Prochlorococcus* (*prochlo*) and  
64 *Synechococcus* (*Synecho* G4) during M156. All abundances unit are 10<sup>6</sup> cell L<sup>-1</sup>.

| Station | Depth (m) | Lon (°W) | Lat (°N) | <i>Prochlo</i> | Euk pico G1 | Euk nano G2 | Euk nano G3 | <i>Synecho</i> G4 | Chrypto G5 |
|---------|-----------|----------|----------|----------------|-------------|-------------|-------------|-------------------|------------|
| E1      | 5         | -24,33   | 18,00    | 0,27           | 0,80        | 1,09        | 0,02        | 3,87              | 0,04       |
| E1      | 25        | -24,33   | 18,00    | 2,07           | 2,72        | 1,17        | 0,01        | 3,92              | 0,05       |
| E1      | 75        | -24,33   | 18,00    | 65,93          | 73,96       | 4,58        | 0,08        | 0,15              | 0,03       |
| E1      | 125       | -24,33   | 18,00    |                | 0,93        | 0,08        | 0,01        | 0,04              | 0,03       |
| E1      | 200       | -24,33   | 18,00    |                | 0,07        | 0,01        | 0,00        | 0,01              | 0,02       |
| S1      | 5         | -23,61   | 18,00    |                | 1,24        | 1,05        | 0,03        | 4,97              | 0,06       |
| S1      | 25        | -23,61   | 18,00    |                | 3,77        | 1,10        | 0,03        | 4,98              | 0,06       |
| S1      | 75        | -23,61   | 18,00    |                | 49,01       | 3,16        | 0,05        | 0,05              | 0,05       |
| S1      | 125       | -23,61   | 18,00    |                | 1,96        | 0,18        | 0,01        | 0,01              | 0,01       |
| S1      | 200       | -23,61   | 18,00    |                | 0,06        | 0,00        | 0,00        | 0,01              | 0,01       |
| S2      | 5         | -22,78   | 18,00    |                | 6,64        | 2,23        | 0,08        | 132,75            | 1,13       |
| S2      | 25        | -22,78   | 18,00    |                | 46,28       | 3,20        | 0,10        | 113,64            | 0,98       |
| S2      | 45        | -22,78   | 18,00    | 220,26         | 236,32      | 10,61       | 0,21        | 25,26             | 0,62       |
| S2      | 100       | -22,78   | 18,00    |                | 4,00        | 0,28        | 0,01        | 0,19              | 0,05       |
| S2      | 200       | -22,78   | 18,00    |                | 0,15        | 0,01        | 0,00        | 0,10              | 0,01       |
| E2      | 5         | -22,00   | 18,00    | 10,30          | 8,19        | 4,25        | 0,10        | 59,70             | 0,40       |
| E2      | 25        | -22,00   | 18,00    | 7,40           | 8,13        | 4,21        | 0,07        | 59,24             | 0,36       |
| E2      | 50        | -22,00   | 18,00    | 64,61          | 94,52       | 10,44       | 0,13        | 44,20             | 0,40       |
| E2      | 100       | -22,00   | 18,00    |                | 0,89        | 0,21        | 0,00        | 0,57              | 0,04       |
| E2      | 200       | -22,00   | 18,00    |                | 0,12        | 0,05        | 0,00        | 0,15              | 0,07       |
| S3      | 5         | -21,13   | 18,00    | 7,87           | 13,91       | 7,62        | 0,10        | 121,85            | 0,37       |
| S3      | 25        | -21,13   | 18,00    |                | 44,97       | 9,19        | 0,12        | 93,14             | 0,30       |
| S3      | 50        | -21,13   | 18,00    |                | 44,48       | 7,53        | 0,31        | 3,03              | 0,20       |
| S3      | 100       | -21,13   | 18,00    |                | 2,22        | 0,28        | 0,00        | 0,75              | 0,04       |
| S3      | 200       | -21,13   | 18,00    |                | 0,16        | 0,05        | 0,00        | 0,34              | 0,05       |
| S4      | 5         | -20,30   | 18,00    |                | 14,70       | 7,14        | 0,09        | 314,54            | 1,11       |

66 Table n°2 cont.: Abundance of eukaryotic picoplankton (Euk Pico G1), eukaryotic nanoplankton (Euk  
67 nano G2, Euk nano G3 and chrytophyta G5) and cyanobacteria *Prochlorococcus* (*prochlo*) and  
68 *Synechococcus* (*Synecho* G4) during M156. All abundances unit are 10<sup>6</sup> cell L<sup>-1</sup>.

| Station | Depth (m) | Lon (°W) | Lat (°N) | <i>Prochlo</i> | Euk pico G1 | Euk nano G2 | Euk nano G3 | <i>Synecho</i> G4 | Chrypto G5 |
|---------|-----------|----------|----------|----------------|-------------|-------------|-------------|-------------------|------------|
| S4      | 25        | -20,30   | 18,00    |                | 17,08       | 6,33        | 0,10        | 270,50            | 0,97       |
| S4      | 35        | -20,30   | 18,00    |                | 51,99       | 7,51        | 0,33        | 99,73             | 0,73       |
| S4      | 100       | -20,30   | 18,00    |                | 1,21        | 0,18        | 0,01        | 0,34              | 0,05       |
| S4      | 200       | -20,30   | 18,00    |                | 0,17        | 0,04        | 0,00        | 0,51              | 0,03       |
| E3      | 5         | -19,55   | 18,00    | 0,32           | 5,69        | 9,92        | 0,42        | 14,47             | 1,44       |
| E3      | 25        | -19,55   | 18,00    | 3,07           | 7,56        | 6,87        | 0,51        | 10,68             | 0,95       |
| E3      | 45        | -19,55   | 18,00    | 13,62          | 18,08       | 6,47        | 0,24        | 16,70             | 0,66       |
| E3      | 90        | -19,55   | 18,00    |                | 0,51        | 0,45        | 0,03        | 0,69              | 0,08       |
| E3      | 200       | -19,55   | 18,00    |                | 0,17        | 0,04        | 0,00        | 0,36              | 0,03       |
| EDZ-1   | 5         | -19,11   | 18,29    | 0,32           | 0,69        | 1,27        | 0,16        | 19,93             | 1,02       |
| EDZ-1   | 27        | -19,11   | 18,29    | 0,90           | 2,87        | 1,42        | 0,27        | 12,39             | 1,71       |
| EDZ-1   | 50        | -19,11   | 18,29    | 0,33           | 2,23        | 0,43        | 0,01        | 1,08              | 0,21       |
| EDZ-1   | 100       | -19,11   | 18,29    |                | 0,37        | 0,13        | 0,01        | 0,49              | 0,15       |
| EDZ-1   | 200       | -19,11   | 18,29    |                | 0,27        | 0,03        | 0,01        | 0,40              | 0,10       |
| EDZ-2   | 5         | -18,83   | 18,29    |                | 1,00        | 1,75        | 0,15        | 37,43             | 0,76       |
| EDZ-2   | 15        | -18,83   | 18,29    |                | 1,32        | 2,42        | 0,23        | 62,77             | 1,32       |
| EDZ-2   | 50        | -18,83   | 18,29    |                | 1,31        | 0,33        | 0,01        | 1,48              | 0,15       |
| EDZ-2   | 100       | -18,83   | 18,29    |                | 0,29        | 0,09        | 0,01        | 0,88              | 0,12       |
| EDZ-2   | 200       | -18,83   | 18,29    |                | 0,21        | 0,05        | 0,00        | 0,54              | 0,04       |
| EDZ-3   | 5         | -18,54   | 18,29    |                | 0,99        | 1,46        | 0,14        | 21,84             | 0,73       |
| EDZ-3   | 25        | -18,54   | 18,29    |                | 1,83        | 0,56        | 0,04        | 4,75              | 0,50       |
| EDZ-3   | 33        | -18,54   | 18,29    |                | 1,28        | 0,37        | 0,01        | 3,05              | 0,23       |
| EDZ-3   | 60        | -18,54   | 18,29    |                | 0,55        | 0,12        | 0,00        | 1,27              | 0,12       |
| EDZ-3   | 150       | -18,54   | 18,29    |                | 0,21        | 0,03        | 0,00        | 0,21              | 0,05       |
| EDM-4   | 5         | -18,37   | 18,58    |                | 19,60       | 6,08        | 0,75        | 360,78            | 5,88       |
| EDM-4   | 23        | -18,37   | 18,58    |                | 20,27       | 5,83        | 0,68        | 349,98            | 5,92       |
| EDM-4   | 40        | -18,37   | 18,58    |                | 3,38        | 1,59        | 0,05        | 11,19             | 0,50       |
| EDM-4   | 100       | -18,37   | 18,58    |                | 0,20        | 0,05        | 0,00        | 0,62              | 0,04       |

69 Table n°2 cont.: Abundance of eukaryotic picoplankton (Euk Pico G1), eukaryotic nanoplankton (Euk  
70 nano G2, Euk nano G3 and chrytophyta G5) and cyanobacteria *Prochlorococcus* (*prochlo*) and  
71 *Synechococcus* (*Synecho* G4) during M156. All abundances unit are 10<sup>6</sup> cell L<sup>-1</sup>.

| Station | Depth (m) | Lon (°W) | Lat (°N) | <i>Prochlo</i> | Euk pico G1 | Euk nano G2 | Euk nano G3 | <i>Synecho</i> G4 | Chrypto G5 |
|---------|-----------|----------|----------|----------------|-------------|-------------|-------------|-------------------|------------|
| EDM-4   | 200       | -18,37   | 18,58    |                | 0,15        | 0,03        | 0,00        | 0,38              | 0,04       |
| EDZ-4   | 5         | -18,26   | 18,29    |                | 14,11       | 1,05        | 0,25        | 78,46             | 1,30       |
| EDZ-4   | 26        | -18,26   | 18,29    |                | 17,12       | 1,78        | 0,21        | 81,37             | 3,39       |
| EDZ-4   | 35        | -18,26   | 18,29    |                | 1,52        | 0,48        | 0,03        | 1,73              | 0,22       |
| EDZ-4   | 100       | -18,26   | 18,29    |                | 0,28        | 0,07        | 0,01        | 0,68              | 0,09       |
| EDZ-4   | 175       | -18,26   | 18,29    |                | 0,21        | 0,03        | 0,00        | 0,31              | 0,04       |
| EDM-2E  | 5         | -18,08   | 19,15    |                | 9,25        | 4,00        | 0,68        | 161,39            | 1,42       |
| EDM-2E  | 30        | -18,08   | 19,15    |                | 6,44        | 2,85        | 0,67        | 59,56             | 1,76       |
| EDM-2E  | 45        | -18,08   | 19,15    |                | 12,59       | 1,62        | 0,03        | 2,01              | 0,16       |
| EDM-2E  | 100       | -18,08   | 19,15    |                | 0,30        | 0,05        | 0,01        | 0,16              | 0,10       |
| EDM-2E  | 200       | -18,08   | 19,15    |                | 0,34        | 0,10        | 0,01        | 0,23              | 0,09       |
| EDM-5E  | 5         | -18,08   | 18,29    |                | 9,74        | 6,19        | 0,55        | 223,60            | 8,16       |
| EDM-5E  | 20        | -18,08   | 18,29    |                | 19,21       | 2,81        | 0,17        | 79,31             | 2,75       |
| EDM-5E  | 32        | -18,08   | 18,29    |                | 0,99        | 0,61        | 0,03        | 2,99              | 0,29       |
| EDM-5E  | 40        | -18,08   | 18,29    |                | 1,20        | 0,41        | 0,01        | 1,41              | 0,16       |
| EDM-5E  | 100       | -18,08   | 18,29    |                | 0,24        | 0,04        | 0,00        | 0,45              | 0,07       |
| EDM-3E  | 5         | -18,08   | 18,87    |                | 20,93       | 7,64        | 1,11        | 387,07            | 4,41       |
| EDM-3E  | 20        | -18,08   | 18,87    |                | 20,62       | 7,48        | 1,04        | 327,21            | 4,51       |
| EDM-3E  | 38        | -18,08   | 18,87    |                | 3,08        | 5,87        | 0,09        | 11,54             | 0,68       |
| EDM-3E  | 50        | -18,08   | 18,87    |                | 0,35        | 0,42        | 0,02        | 0,94              | 0,10       |
| EDM-3E  | 150       | -18,08   | 18,87    |                | 0,22        | 0,07        | 0,00        | 0,42              | 0,06       |
| S5      | 5         | -18,08   | 18,00    |                | 6,91        | 6,57        | 0,11        | 123,33            | 0,61       |
| S5      | 25        | -18,08   | 18,00    |                | 17,98       | 11,16       | 0,27        | 363,00            | 4,56       |
| S5      | 32        | -18,08   | 18,00    |                | 19,37       | 11,75       | 0,32        | 377,85            | 5,18       |
| S5      | 50        | -18,08   | 18,00    |                | 1,47        | 0,79        | 0,05        | 2,31              | 0,27       |
| S5      | 200       | -18,08   | 18,00    |                | 0,18        | 0,05        | 0,00        | 0,51              | 0,08       |
| EDM-4E  | 5         | -18,08   | 18,58    |                | 33,52       | 8,91        | 0,34        | 621,81            | 8,25       |
| EDM-4E  | 15        | -18,08   | 18,58    |                | 29,42       | 7,47        | 0,29        | 415,08            | 5,79       |

72 Table n°2 cont.: Abundance of eukaryotic picoplankton (Euk Pico G1), eukaryotic nanoplankton (Euk  
73 nano G2, Euk nano G3 and chrytophyta G5) and cyanobacteria *Prochlorococcus* (*prochlo*) and  
74 *Synechococcus* (*Synecho* G4) during M156. All abundances unit are 10<sup>6</sup> cell L<sup>-1</sup>.

| Station | Depth (m) | Lon (°W) | Lat (°N) | <i>Prochlo</i> | Euk pico G1 | Euk nano G2 | Euk nano G3 | <i>Synecho</i> G4 | Chrypto G5 |
|---------|-----------|----------|----------|----------------|-------------|-------------|-------------|-------------------|------------|
| EDM-4E  | 35        | -18,08   | 18,58    |                | 2,43        | 2,35        | 0,03        | 4,49              | 0,27       |
| EDM-4E  | 60        | -18,08   | 18,58    |                | 0,32        | 0,19        | 0,01        | 0,86              | 0,08       |
| EDM-4E  | 200       | -18,08   | 18,58    |                | 0,17        | 0,05        | 0,00        | 0,31              | 0,06       |
| EDZ-5N  | 5         | -17,97   | 18,58    |                | 67,33       | 8,96        | 0,39        | 741,36            | 10,14      |
| EDZ-5N  | 20        | -17,97   | 18,58    |                | 45,39       | 5,78        | 0,40        | 458,39            | 8,94       |
| EDZ-5N  | 30        | -17,97   | 18,58    |                | 0,72        | 1,27        | 0,07        | 3,03              | 0,35       |
| EDZ-5N  | 100       | -17,97   | 18,58    |                | 0,19        | 0,05        | 0,01        | 0,66              | 0,05       |
| EDZ-5N  | 200       | -17,97   | 18,58    |                | 0,17        | 0,02        | 0,00        | 0,69              | 0,08       |
| EDZ-6N  | 5         | -17,68   | 18,58    |                | 11,86       | 4,35        | 0,35        | 267,15            | 4,57       |
| EDZ-6N  | 14        | -17,68   | 18,58    |                | 8,53        | 1,48        | 0,16        | 31,98             | 1,86       |
| EDZ-6N  | 44        | -17,68   | 18,58    |                | 0,51        | 0,84        | 0,01        | 2,28              | 0,18       |
| EDZ-6N  | 100       | -17,68   | 18,58    |                | 0,25        | 0,11        | 0,00        | 2,12              | 0,13       |
| EDZ-6N  | 200       | -17,68   | 18,58    |                | 0,17        | 0,07        | 0,00        | 0,81              | 0,05       |
| EDZ-7N  | 5         | -17,39   | 18,58    |                | 1,80        | 2,33        | 0,59        | 274,47            | 1,41       |
| EDZ-7N  | 20        | -17,39   | 18,58    |                | 7,50        | 1,88        | 0,45        | 273,86            | 1,59       |
| EDZ-7N  | 40        | -17,39   | 18,58    |                | 0,35        | 0,40        | 0,03        | 3,51              | 0,23       |
| EDZ-7N  | 75        | -17,39   | 18,58    |                | 0,28        | 0,10        | 0,00        | 3,56              | 0,15       |
| EDZ-7N  | 170       | -17,39   | 18,58    |                | 0,17        | 0,03        | 0,01        | 1,28              | 0,08       |
| EDZ-8N  | 5         | -17,11   | 18,58    |                | 2,95        | 6,58        | 0,39        | 642,99            | 2,80       |
| EDZ-8N  | 17        | -17,11   | 18,58    |                | 14,81       | 10,72       | 0,54        | 1079,84           | 6,01       |
| EDZ-8N  | 40        | -17,11   | 18,58    |                | 0,41        | 0,30        | 0,01        | 1,12              | 0,17       |
| EDZ-8N  | 125       | -17,11   | 18,58    |                | 0,31        | 0,12        | 0,00        | 1,90              | 0,12       |
| S6      | 5         | -16,92   | 18,00    |                | 9,32        | 4,91        | 0,19        | 13,11             | 0,31       |
| S6      | 28        | -16,92   | 18,00    |                | 40,19       | 17,29       | 0,20        | 24,59             | 0,39       |
| S6      | 50        | -16,92   | 18,00    |                | 17,20       | 13,21       | 0,13        | 72,63             | 1,06       |
| S6      | 130       | -16,92   | 18,00    |                | 1,95        | 0,53        | 0,01        | 1,60              | 0,09       |
| EDZ-10N | 10        | -16,53   | 18,58    |                | 3,16        | 2,39        | 0,05        | 48,53             | 0,33       |
| EDZ-10N | 20        | -16,53   | 18,58    |                | 3,63        | 2,31        | 0,03        | 57,46             | 0,29       |

75 Table n°2 cont.: Abundance of eukaryotic picoplankton (Euk Pico G1), eukaryotic nanoplankton (Euk  
76 nano G2, Euk nano G3 and chrytophyta G5) and cyanobacteria *Prochlorococcus* (*prochlo*) and  
77 *Synechococcus* (*Synecho* G4) during M156. All abundances unit are 10<sup>6</sup> cell L<sup>-1</sup>.

| Station | Depth (m) | Lon (°W) | Lat (°N) | <i>Prochlo</i> | Euk pico G1 | Euk nano G2 | Euk nano G3 | <i>Synecho</i> G4 | Chrypto G5 |
|---------|-----------|----------|----------|----------------|-------------|-------------|-------------|-------------------|------------|
| EDZ-10N | 44        | -16,53   | 18,58    |                | 78,20       | 13,03       | 0,18        | 102,19            | 2,15       |
| EDZ-10N | 75        | -16,53   | 18,58    |                | 7,10        | 1,45        | 0,02        | 3,16              | 0,16       |
| EDZ-10N | 119       | -16,53   | 18,58    |                | 0,59        | 0,20        | 0,01        | 2,24              | 0,19       |
| E5      | 5         | -16,52   | 18,17    | 4,37           | 5,97        | 1,56        | 0,05        | 63,10             | 0,46       |

78

79

## 80 Community respiration using the optode-based method

81

82 The most used technique to determine the trophic state of a system (autotrophy or heterotrophy)  
83 is the Winkler method with dark-light bottle incubation from which gross primary production  
84 and community respiration rates ratio is obtained (GPP/CR; e.g. Regaudie-de-Gioux et al.  
85 2012). But the Winkler method is time-consuming and to study BR, a filtration step is  
86 mandatory which causes two major problems, oxygen contamination of the samples and an  
87 overestimation of BR by removing the protistan grazer (Aranguren-Gassis et al. 2012). Shorter  
88 incubation with *in-vivo* ETS method (Martínez-García et al. 2009) reducing filtration impacts  
89 had shown that Community respiration (CR) and BR are tightly correlated even in the  
90 oligotrophic area (Aranguren-Gassis et al. 2012). However, such techniques still distort water  
91 oxygen properties and therefore are not suitable when it comes to investigating oxygen  
92 minimum zones, which occurred in our case. Optode-method was therefore a suitable option in  
93 terms of precision, rapidity of implementation, and ability to maintain water properties.

94 Optodes were glued to the inside surfaces of Winkler-bottles using silicone cement (Warkentin  
95 et al. 2007). We allowed the silicone to cure for 2 days at room temperature. Before the cruise,  
96 we performed a two-point calibration of optodes according to the manufacturer's instructions  
97 using air-saturated and temperature-equilibrated samples and oxygen-depleted samples  
98 obtained by dissolving Na<sub>2</sub>SO<sub>3</sub> into Milli-Q water (10g L<sup>-1</sup>). We measured the  
99 photoluminescence lifetime of the luminophores within sensor spots by a fiber-optic oxygen  
100 meter (Fibox 3; PreSens GmbH) fixed outside of the bottle opposite to inside sensor spots. We  
101 supplied excitation light (505 nm), which also transported the emitted fluorescence signal (600  
102 nm) back to the oxygen meter (Warkentin, 2007). We incubated optodes bottles at 14°C in the  
103 dark for at least 24h and with at least four-time point measurements. We followed the



104 temperature inside bottles with a Pt100 Temperature Sensor (Presens) to monitor temperature  
105 acclimation. Oxygen concentrations were measured every 2s during an interval of 3 to 5  
106 minutes and data were recorded using OxyView 7.01 (PreSens GmbH). Bottles were rinsed  
107 between each set of incubations with 4-5% HCL (manufacturer indication) and five times with  
108 18 MΩ Mili-Q. Incubations were initiated by transferring seawater to the glass bottles using  
109 standard gas sampling techniques to avoid oxygen contamination. Site-specific values for  
110 salinity compensation of the oxygen readings were obtained from cabled CTD casts. Oxygen  
111 measurements were corrected using the Presens oxygen calculator with the mean temperature  
112 value measured at each time point (in extra temperature-control bottles) and with the *in-situ*  
113 salinity to determine the absolute [O<sub>2</sub>] values. [O<sub>2</sub>] values precision was validated by  
114 comparison of values measured directly after sampling and CTD oxygen data corrected with  
115 Winkler titrations (Fig. S2) for the same depth.

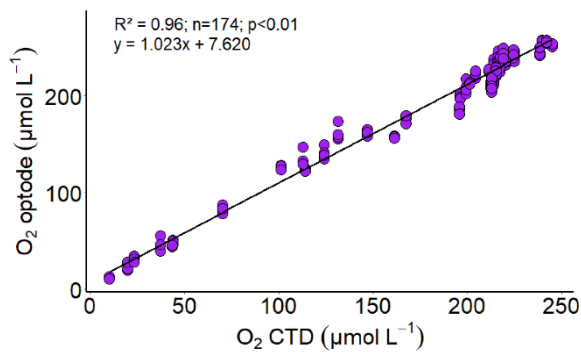

116  
117 Figure S2: Linear correlation between calibrated oxygen values obtained from the CTD and oxygen  
118 concentration measured with optode directly after sampling during the community respiration  
119 experiments.

120  
121 We determined the drift commonly occurring with optode-based methods (Wikner et al. 2013;  
122 Vikström et al. 2019) by collecting and filtering seawater through 0.2µm nucleopore filters  
123 which were incubated in the dark like the samples. Non-linear oxygen dynamics are frequent  
124 in oxygen measurement, (Briand et al. 2004, Vikström et al. 2019) in both natural and  
125 manipulated samples. Therefore, Akaike information criteria (AIC; Snipes and Taylor 2014)  
126 was used to determine when nonlinear oxygen dynamics occurred. Then a quadratic polynomial  
127 (Eq. 1) was fitted to the data:

128  $[O_2] = C + at + bt^2$  (Eq. 1)

129 Here,  $[O_2]$  is the absolute oxygen concentration at time  $t$ ,  $C$  the y-axis intercept, and  $a$  and  $b$  are  
 130 coefficients. As oxygen respiration is assumed to be linear, daily CR was calculated using the  
 131 difference of the linear (or quadratic polynomial) regression between  $t_0$  (after temperature  
 132 acclimation) and 24 h. We obtained a detection limit of CR of  $0.62 \mu\text{mol O}_2 \text{ L}^{-1} \text{ d}^{-1}$  by taking  
 133 the standard error of the oxygen decline ( $SE_{\text{sample}}$ ) and residual standard error in  $0.2 \mu\text{m}$  filtered  
 134 seawater ( $SE_{\text{background}}$ ) into account and using  $SE_{\text{Total}}$  as a detection limit according to Eq.2:

$$135 \quad SE_{\text{Total}} = \sqrt{SE_{\text{samples}}^2 + SE_{\text{background}}^2} \quad (\text{Eq.2})$$

136

137 Extrapolation of ex-situ BP and CR rates at  $22^\circ\text{C}$

138

139 As we measured the microbial activities at different incubation temperatures for technical  
 140 concern, we decided to convert the values of BP and CR at  $22^\circ\text{C}$  because we could not  
 141 successfully extrapolate the  $PP_{\text{TOT}}$  rates to in-situ temperature. For that we used equations from  
 142 López-Urrutia and Morán for BP ( $BP_U$ ; 2007; Eq.5) and from Regaudie de Gioux and Duarte  
 143 for CR ( $CR_{RG}$ ; 2012; Eq.7).

$$144 \quad BP_U = \left[ e^{-0.589/(kT)} \times \left[ \frac{2.33 \times 10^{11} \text{chl } a}{\text{chl } a + 4.08} + 6.77 \times 10^9 \right] \right] \times \text{Bacterial abundance} \quad (\text{Eq. 5})$$

145 Temperature and resource availability effects on cell-specific bacterial metabolism, with  $k$ , the  
 146 Boltzmann's constant ( $8.617734 \times 10^{-5} \text{ eV K}^{-1}$ ),  $T$  the water temperature ( $^\circ\text{K}$ ),  $\text{chl } a$ , the *in-situ*  
 147 chlorophyll  $a$  concentration in  $\mu\text{g L}^{-1}$  and *in-situ* bacterial abundance in  $\text{cell L}^{-1}$ .

$$148 \quad \text{Ln}^{\left(\frac{CR_{RG}}{\text{chl } a}\right)} = -0,66 \times \left(\frac{1}{kT}\right) + 27,72 \quad (\text{Eq.6})$$

$$149 \quad CR_{RG} = e^{\text{Ln}^{\left(\frac{CR}{\text{chl } a}\right)}} \times \text{chl } a \quad (\text{Eq.7})$$

150 The linear relationship between the natural logarithm of the volumetric specific chlorophyll a-  
 151 CR rates ( $\frac{CR}{\text{chl } a}$  in  $\text{mmol O}_2 \text{ mg Chl } a^{-1} \text{ d}^{-1}$ ) within  $1^\circ\text{C}$  bin and the inverted water temperature  
 152 ( $1/kT$  with  $k$ , the Boltzmann's constant ( $8.617734 \times 10^{-5} \text{ eV K}^{-1}$ ) and with  $T$ , the water  
 153 temperature ( $^\circ\text{K}$ )).  $CR_{RG}$  ( $\mu\text{mol O}_2 \text{ L}^{-1} \text{ d}^{-1}$ ) was then obtained from the exponential of the natural  
 154 logarithm of the volumetric specific chlorophyll a-CR rates multiplied by the *in-situ* chlorophyll  
 155  $a$  ( $\text{Chl } a$  in  $\mu\text{g L}^{-1}$ ).

156 Then, we compared the rates of BP and CR measured *ex-situ* ( $BP_{ex-situ}$  and  $CR_{ex-situ}$ ) with  
 157 the rates obtained from  $BP_U$  and  $CR_{RG}$  calculated at the temperature set during the incubations  
 158 (Fig. S3). It was 14°C for BP and for CR (~14°C) they are listed in table 3. The rates obtained  
 159 from the equations ( $BP_U$  and  $CR_{RG}$ ) were significantly correlated (Fig. S3) and within the ranges  
 160 of the rates measured with *ex-situ* incubations ( $BP_{ex-situ}$  and  $CR_{ex-situ}$ ). Therefore, we used the  
 161 correlation between  $BP_U$  and  $CR_{RG}$  rates (Fig. S4) calculated at the incubation temperature and  
 162 at 22°C to extrapolate BP and CR at 22°C:

163  $BP_{22^\circ C} = BP_{14^\circ C} \times 0,996$

164  $CR_{22^\circ C} = CR_{14^\circ C} \times 2.011 - 0.013$

165

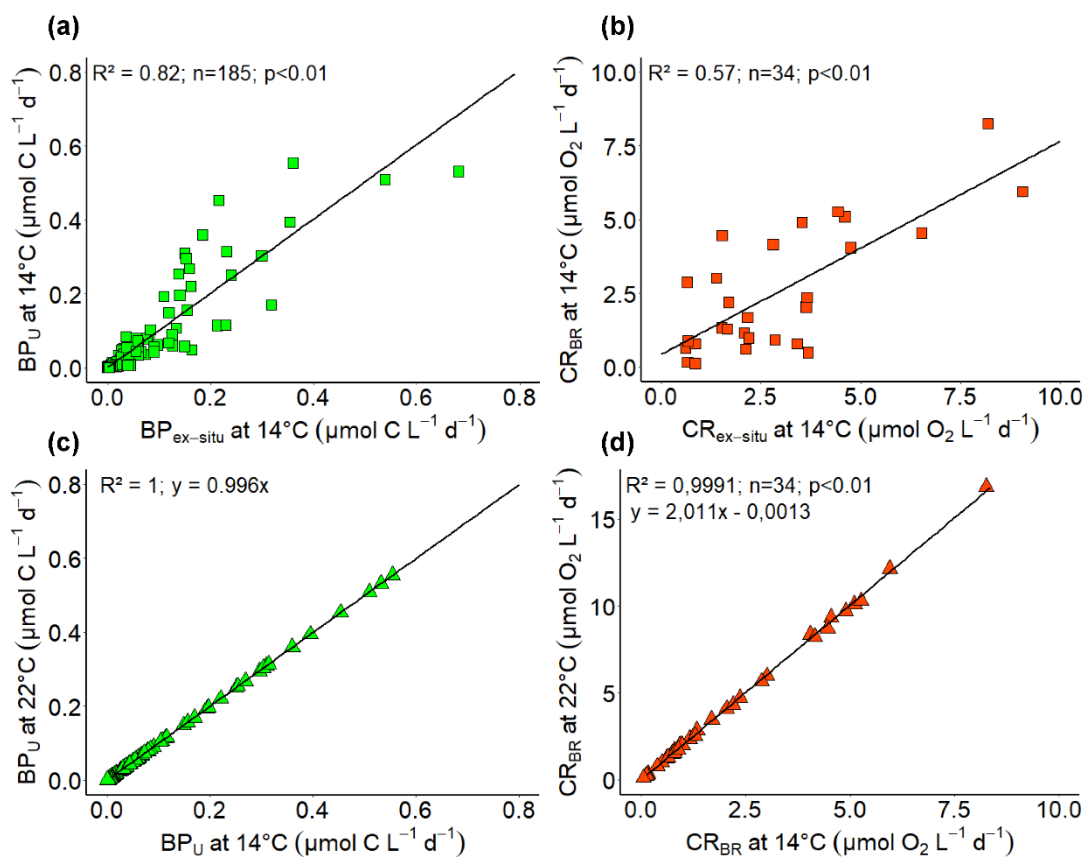

166

167 Figure S3: Linear relationship between  $BP_U$  and  $CR_{RG}$  rates calculated at the temperature measured  
 168 during *ex-situ* incubation (14°C for BP, see table S2 for CR) and the *ex-situ* BP (a) and CR rates (b) and  
 169 linear relationship between  $BP_U$  and  $CR_{RG}$  rates calculated at the temperature measured during *ex-situ*  
 170 incubation (14°C for BP, see table S2 for CR) and 22°C, (c) and (d).

172  
 173

174 Table n°3: Average and standard deviation (SD) of temperature measured during community  
 175 respiration experiments.

| Station | Depth (m) | Incubation temperature |      | Station | Depth (m) | Incubation temperature |      |
|---------|-----------|------------------------|------|---------|-----------|------------------------|------|
|         |           | Average                | SD   |         |           | Average                | SD   |
| E1      | 5         | 13,91                  | 0,12 | EDM-4   | 5         | 14,43                  | 0,01 |
|         | 25        | 13,86                  | 0,14 |         | 23        | 14,43                  | 0,03 |
|         | 75        | 13,90                  | 0,13 |         | 40        | 14,40                  | 0,03 |
|         | 125       | 13,86                  | 0,17 |         | 100       | 14,42                  | 0,04 |
| E2      | 5         | 14,13                  | 0,10 | EDM-4E  | 5         | 14,55                  | 0,02 |
|         | 25        | 14,15                  | 0,09 |         | 15        | 14,56                  | 0,02 |
|         | 50        | 14,17                  | 0,12 |         | 35        | 14,56                  | 0,02 |
|         | 100       | 14,15                  | 0,12 |         | 60        | 14,55                  | 0,01 |
| S3      | 5         | 13,55                  | 0,15 | EDZ-5N  | 5         | 14,43                  | 0,12 |
|         | 25        | 13,56                  | 0,16 |         | 20        | 14,41                  | 0,12 |
|         | 50        | 13,59                  | 0,19 |         | 32        | 14,42                  | 0,11 |
|         | 100       | 13,53                  | 0,15 |         | 100       | 14,39                  | 0,13 |
| E3      | 5         | 14,01                  | 0,05 | EDZ-7N  | 5         | 14,33                  | 0,06 |
|         | 25        | 13,96                  | 0,06 |         | 25        | 14,35                  | 0,06 |
|         | 45        | 13,98                  | 0,06 | E5      | 5         | 14,49                  | 0,05 |
|         | 90        | 14,02                  | 0,06 |         | 15        | 14,49                  | 0,04 |
| EDZ-2   | 5         | 14,10                  | 0,05 |         | 35        | 14,49                  | 0,05 |
|         | 15        | 14,10                  | 0,05 |         |           |                        |      |
|         | 50        | 14,09                  | 0,05 |         |           |                        |      |
|         | 100       | 14,10                  | 0,05 |         |           |                        |      |

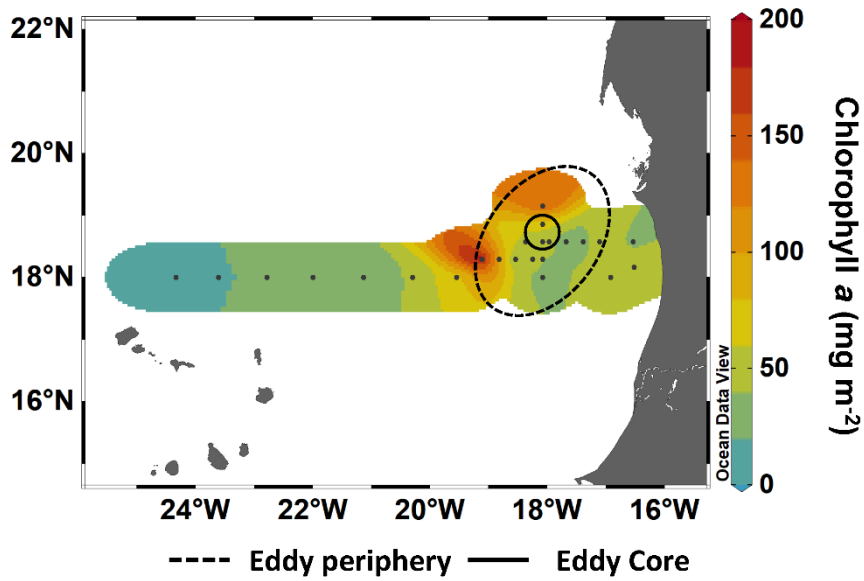

177

178 Figure S4: Integrated Chlorophyll *a* over 100m depth.

179

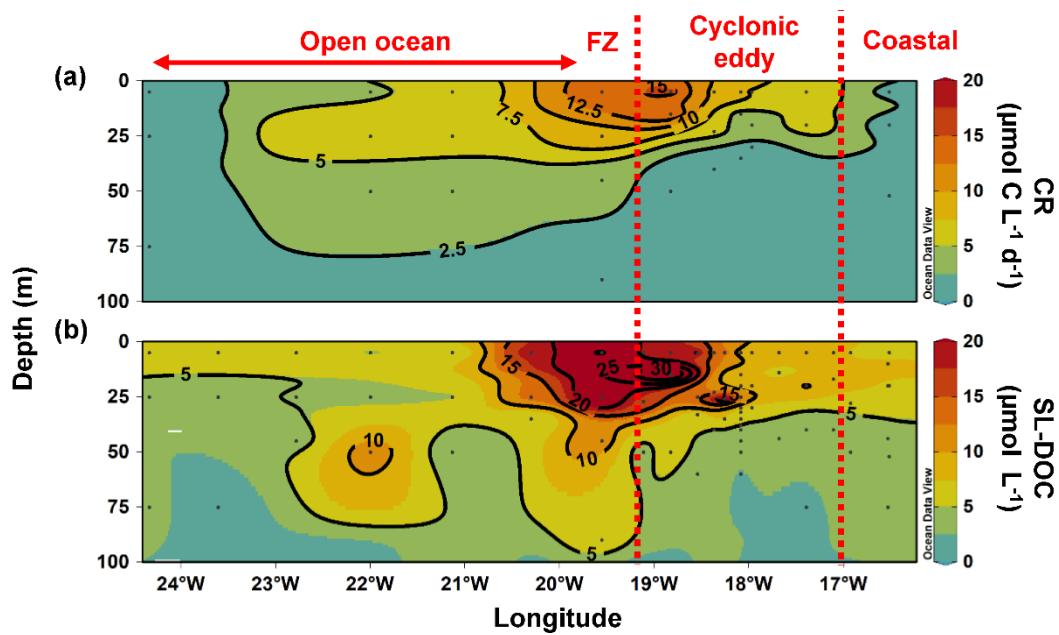

180

181 Figure S5: depth distribution of (a) community respiration and (b) Semi-labile dissolve organic carbon  
 182 (SLDOC) over 100m depth. Red dashed line show the eddy-influenced area and FZ refer as Frontal  
 183 Zone.

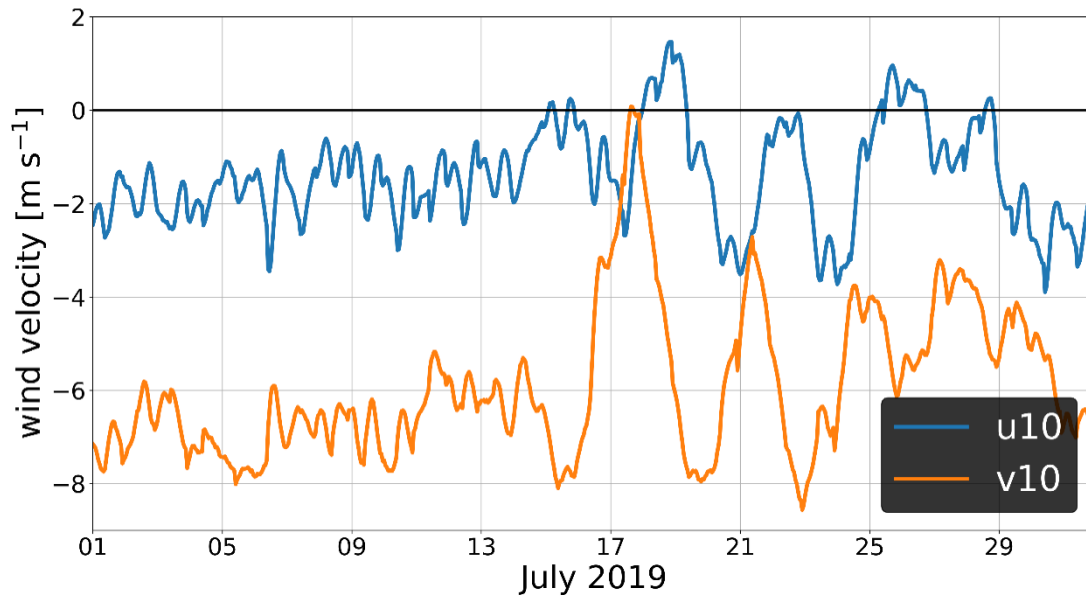

184 Figure  
 185 S6: Domain averaged (25W-16W, 16N-22N) eastward (u10) and northward (v10) component of the  
 186 10m wind. Data were obtained from ERA5 database (Hersbach et al., 2018)

187

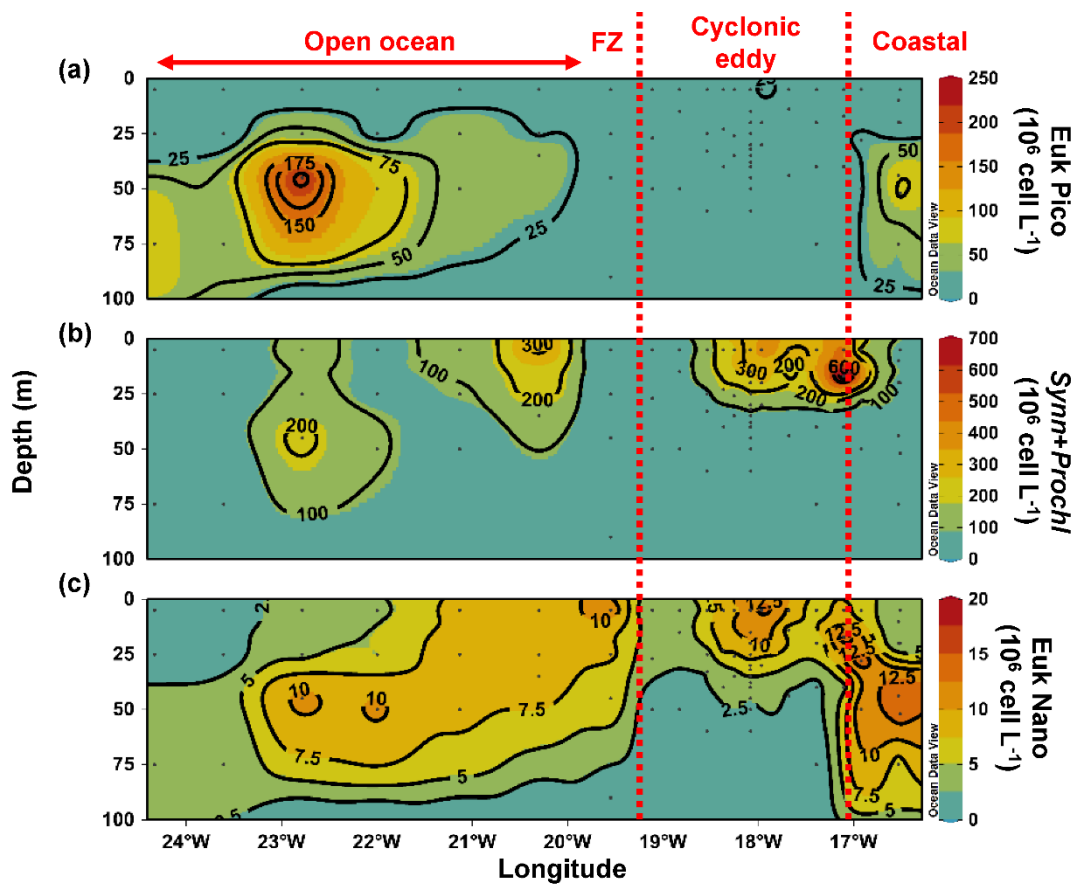

188 Figure S7: depth distribution of (a) eukaryotic picoplankton abundance, (b) sum of cyanobacteria  
 189 *prochlorococcus* and *synechococcus* abundance, (c) sum of eukaryotic nanoplankton abundance (G2  
 190 and G3 and chryptophyta) over 100m depth. Red dashed line show the eddy-influenced area and FZ  
 191 refer as Frontal Zone. see SI Table 2 for details.  
 192

193 Reference  
194

195 Aranguren-Gassis, M., Teira, E., Serret, P., Martínez-García, S., and Fernández, E.: Potential  
196 overestimation of bacterial respiration rates in oligotrophic plankton communities, *Mar. Ecol.*  
197 *Prog. Ser.*, 453, 1–10, <https://doi.org/10.3354/meps09707>, 2012.

198 Briand, E., Pringault, O., Jacquet, S., and Torréton, J. P.: The use of oxygen microprobes to  
199 measure bacterial respiration for determining bacterioplankton growth efficiency. *Limnol.*  
200 *Oceanogr. Methods*, 2(12), 406–416, <https://doi.org/10.4319/lom.2004.2.406>, 2004.

201 Fischer, T., Karstensen, J., Dengler, M., and Bendinger, A.: Multiplatform observation of  
202 cyclonic eddies during the REEBUS experiment, EGU General Assembly 2021, online, 19–30  
203 Apr 2021, EGU21-6537, <https://doi.org/10.5194/egusphere-egu21-6537>, 2021.

204 Hersbach, H., Bell, B., Berrisford, P., Biavati, G., Horányi, A., Muñoz Sabater, J., Nicolas, J.,  
205 Peubey, C., Radu, R., Rozum, I., Schepers, D., Simmons, A., Soci, C., Dee, D., Thépaut, J.-N.:  
206 ERA5 hourly data on single levels from 1979 to present. Copernicus Climate Change Service  
207 (C3S) Climate Data Store (CDS). (Accessed on 08-Oct-2021), 10.24381/cds.adbb2d47, 2018.

208 López-Urrutia, Á., and Morán, X. A. G.: Resource limitation of bacterial production distorts  
209 the temperature dependence of oceanic carbon cycling, *Ecology*, 88(4), 817–822.  
210 <https://doi.org/10.1890/06-1641>, 2007.

211 Martínez-García, S., Fernández, E., Aranguren-Gassis, M., and Teira, E.: In vivo electron  
212 transport system activity: A method to estimate respiration in natural marine microbial  
213 planktonic communities, *Limnol. Oceanogr. Methods*, 7, 459–469,  
214 <https://doi.org/10.4319/lom.2009.7.459>, 2009.

215 Regaudie-De-Gioux, A., and Duarte, C. M.: Temperature dependence of planktonic metabolism  
216 in the ocean, *Glob. Biogeochem. Cycles.*, 26(1), 1–10. <https://doi.org/10.1029/2010GB003907>,  
217 2012.

218 Snipes, M., and Taylor, D. C.: Model selection and Akaike Information Criteria: An example  
219 from wine ratings and prices, *Wine Econ. Policy*, 3(1), 3–9.  
220 <https://doi.org/10.1016/j.wep.2014.03.001>, 2014.

221 Vikström, K., Tengberg, A., & Wikner, J.: Improved accuracy of optode-based oxygen  
222 consumption measurements by removal of system drift and nonlinear derivation, *Limnol.*  
223 *Oceanogr. Methods*, 17(3), 179–189, <https://doi.org/10.1002/lom3.10297>, 2019.

224 Warkentin, M., Freese, H. M., Karsten, U., and Schumann, R.: New and fast method to quantify  
225 respiration rates of bacterial and plankton communities in freshwater ecosystems by using  
226 optical oxygen sensor spots, *Appl. Environ. Microbiol.*, 73(21), 6722–6729,  
227 <https://doi.org/10.1128/AEM.00405-07>, 2007.

228 Wikner, J., Panigrahi, S., Nydahl, A., Lundberg, E., Båmstedt, U., and Tengberg, A.: Precise  
229 continuous measurements of pelagic respiration in coastal waters with Oxygen Optodes.  
230 *Limnol. Oceanogr. Methods*, 11, 1–15, <https://doi.org/10.4319/lom.2013.11.1>, 2013.
